# Supplementary material for: Bacterial floc mediated rapid streamer formation in creeping flows
Source: PubMed Central journal article supplement (PMC4538384; doi:10.1038/srep13070), 2015-08-17
Supplement: srep13070-s1.pdf [file srep13070-s1.pdf]

# Supplementary Information for

## Bacterial floc mediated rapid streamer formation in creeping flows

Mahtab Hassanpourfard<sup>a</sup>, Zahra Nikakhtari<sup>b</sup>, Ranajay Ghosh<sup>c</sup>, Siddhartha Das<sup>d</sup>, Thomas Thundat<sup>a</sup>, Yang Liu<sup>e</sup>, Alope Kumar<sup>b\*</sup>

<sup>a</sup>Department of Chemical and Materials Engineering, University of Alberta, Edmonton, Canada

<sup>b</sup>Department of Mechanical Engineering, University of Alberta, Edmonton, Canada

<sup>c</sup>Department of Mechanical and Industrial Engineering, Northeastern University, Boston MA 02115, USA

<sup>d</sup> Department of Mechanical Engineering, University of Maryland, College Park, MD 20742, USA

<sup>e</sup>Department of Civil and Environmental Engineering, University of Alberta, Edmonton, Canada

\*Email for Correspondence: [aloke.kumar@ualberta.ca](mailto:aloke.kumar@ualberta.ca)

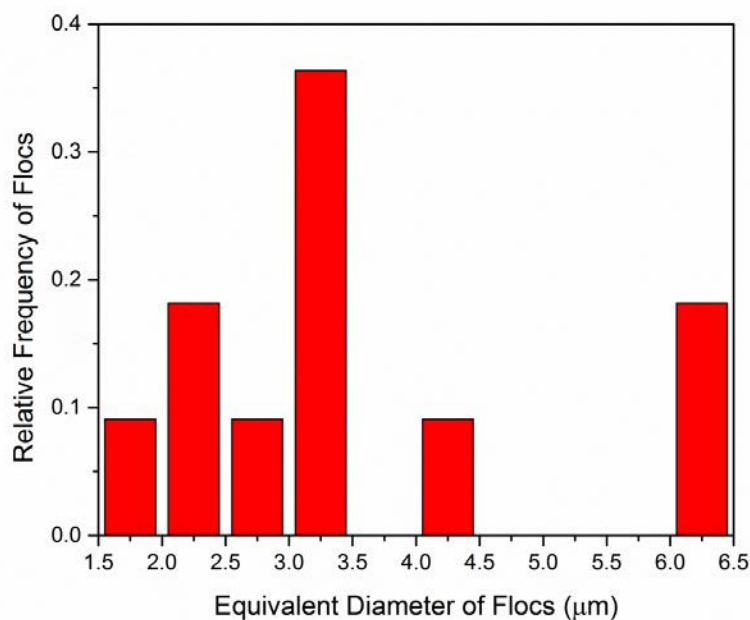

**Figure S1:** Relative frequency of flocs sizes entering the microfluidic channel.

a)

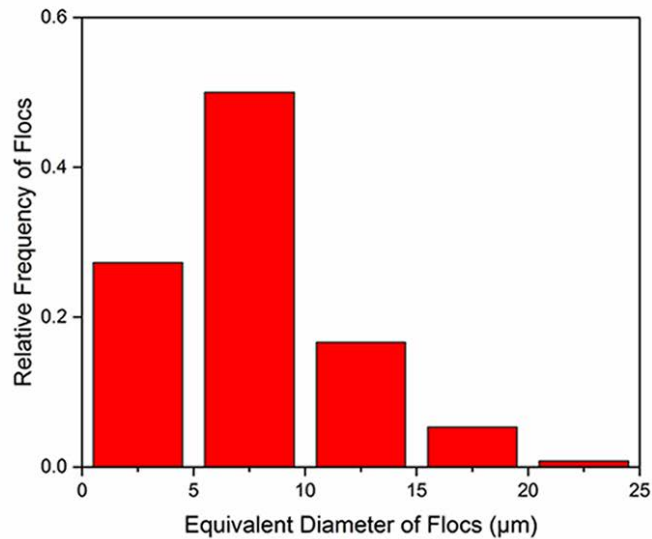

b)

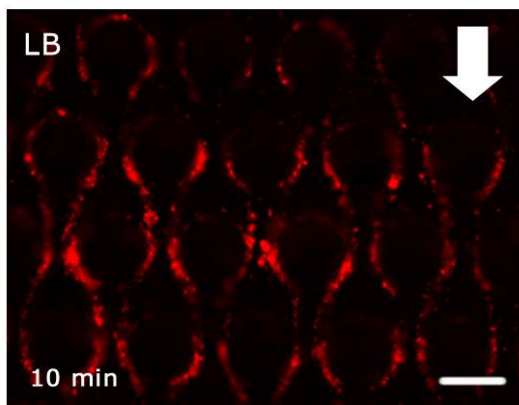

c)

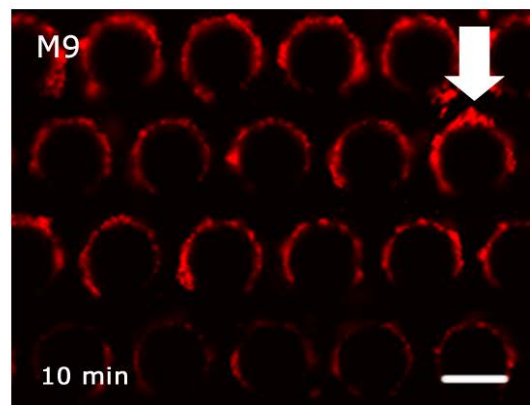

**Figure S2:** (a) Relative frequency histogram of the flocs cultured in M9 media. The median and mode for this relative frequency histogram are 6.78 and 5.85  $\mu\text{m}$ , respectively (b) & (c) Comparison of streamer formation in LB and M9 media. Streamers did not form in M9 media at short-time scales ( $\sim$  few minutes) as compared to LB media.

## Supplementary Videos

**Supplementary Video 1:** Video shows formation of streamers. Video runs at 2X i.e. 1 second of video time represents 2 seconds of experimental time. Scale bar represents 50  $\mu\text{m}$ .

**Supplementary Video 2:** Video shows the large time scale movement of the streamer. A timer (hr:min:secs:milliseconds) depicts the experimental time. Note that the video has been sped up 32x. Scale bar represents 50  $\mu\text{m}$ .
